# Supplementary material
Source: publisher site journal article supplement (https://www.dovepress.com/article/532066)
Supplement: Supplementary file 1 [file Supplementary%20Materials.docx]

**
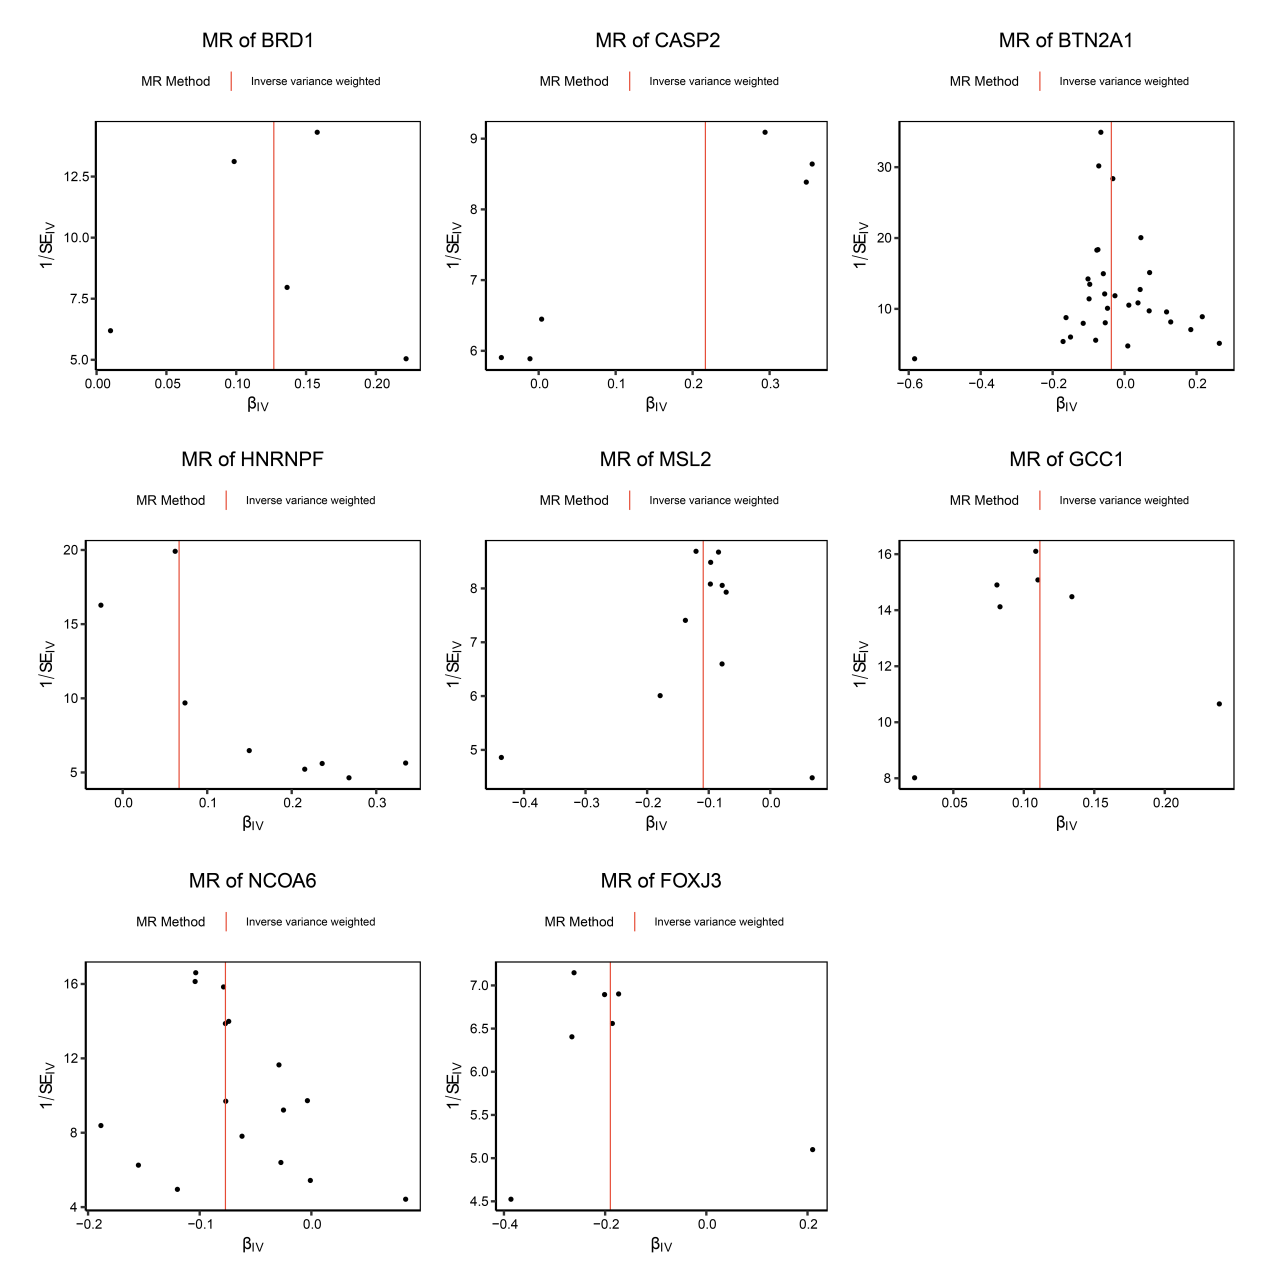
**

**Supplementary Figure 1** Funnel plot of candidate genes.


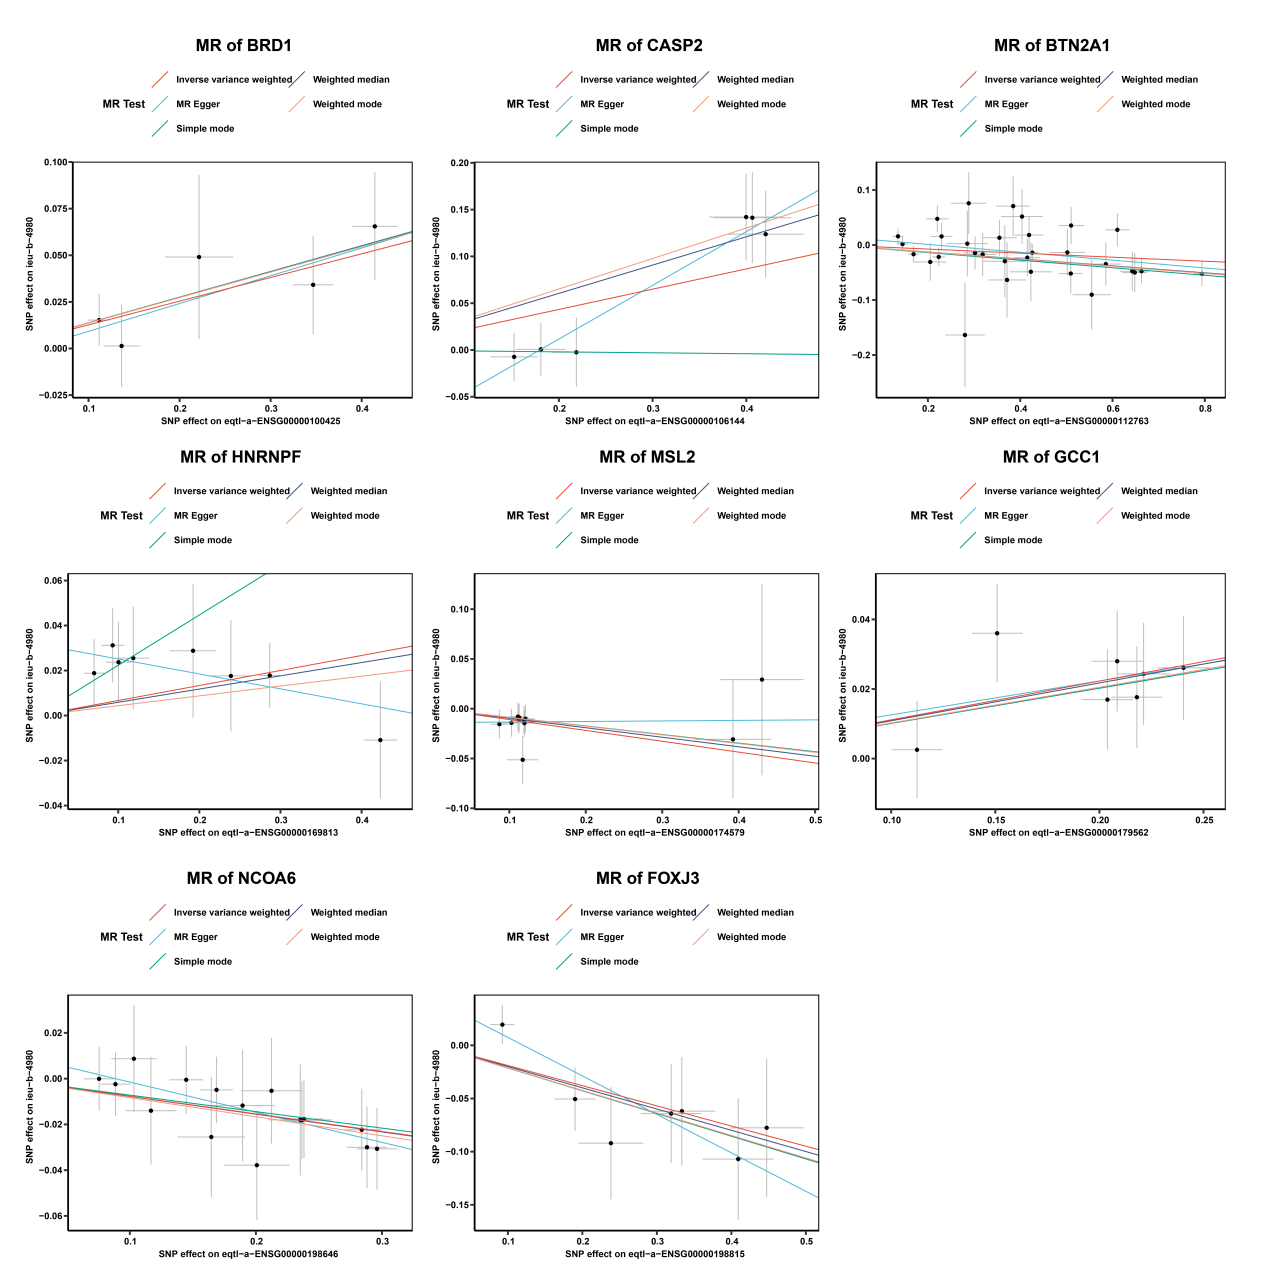


**Supplementary Figure 2** The scatter plot of candidate genes.


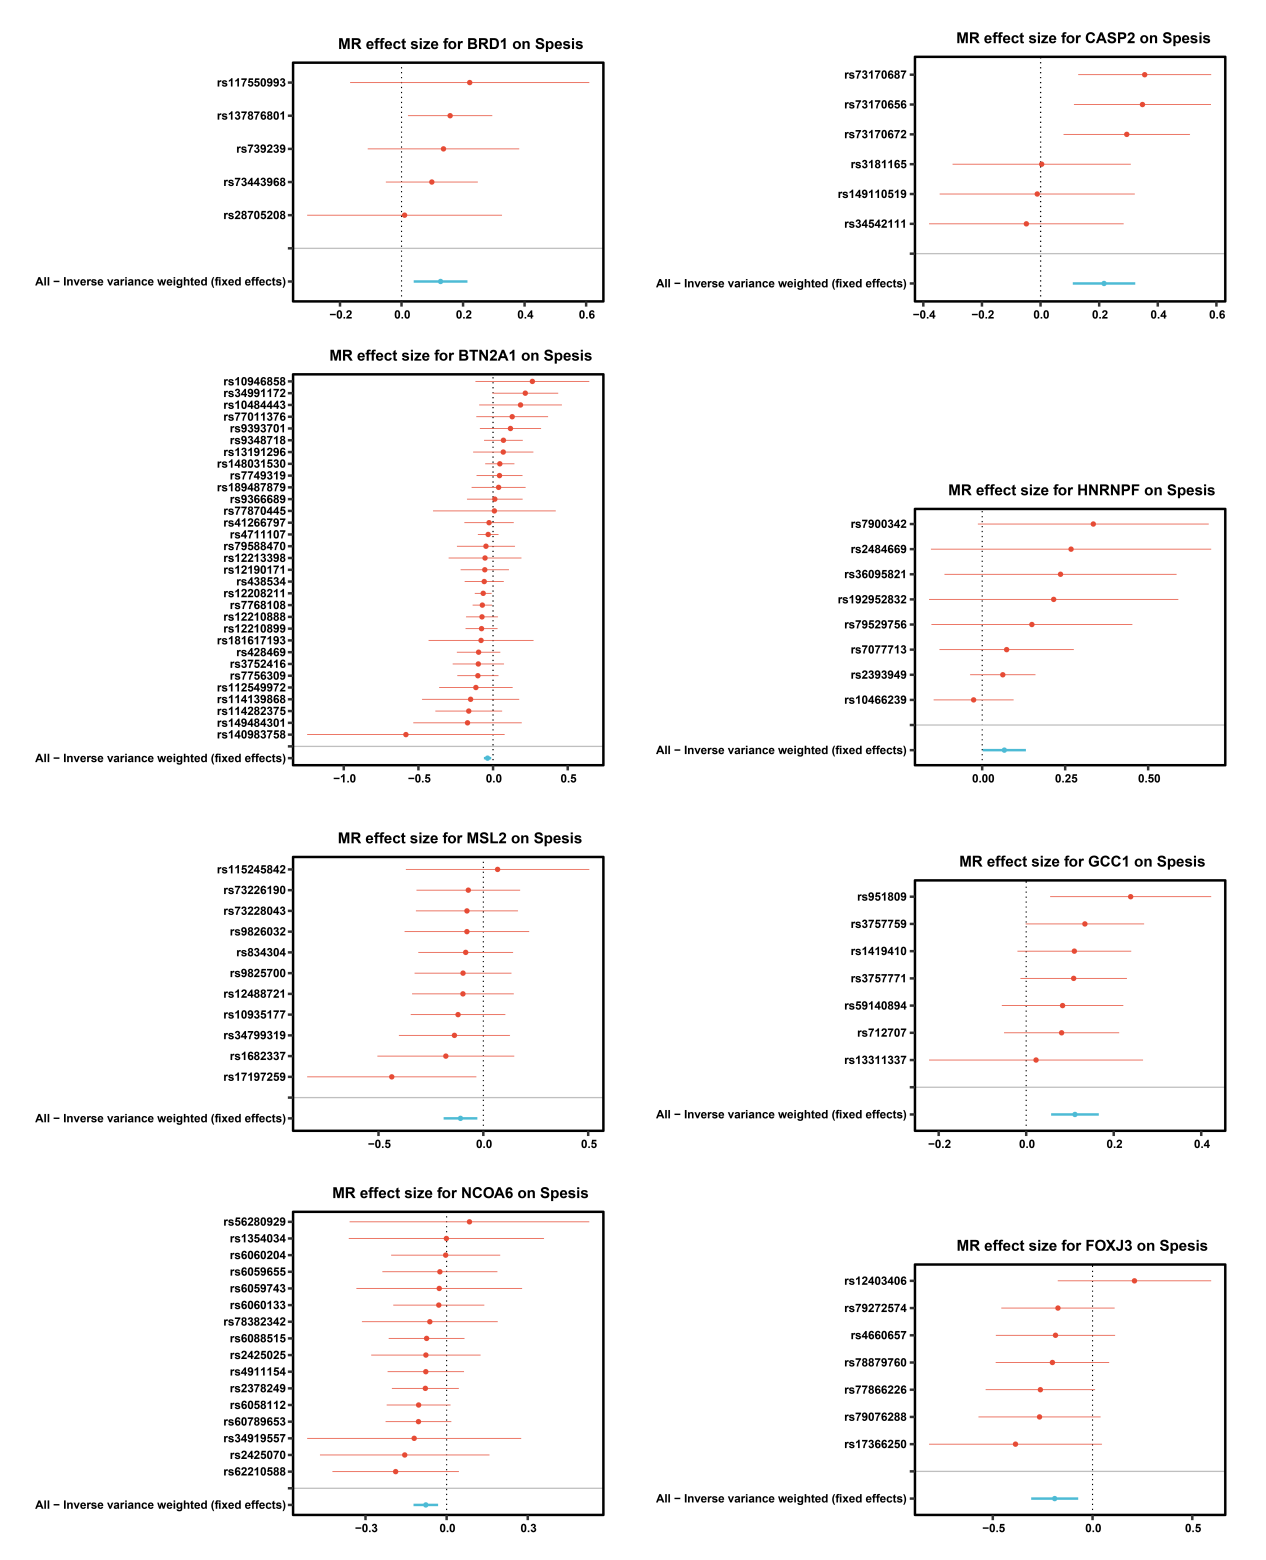


**Supplementary Figure 3** The forest plot of candidate genes.


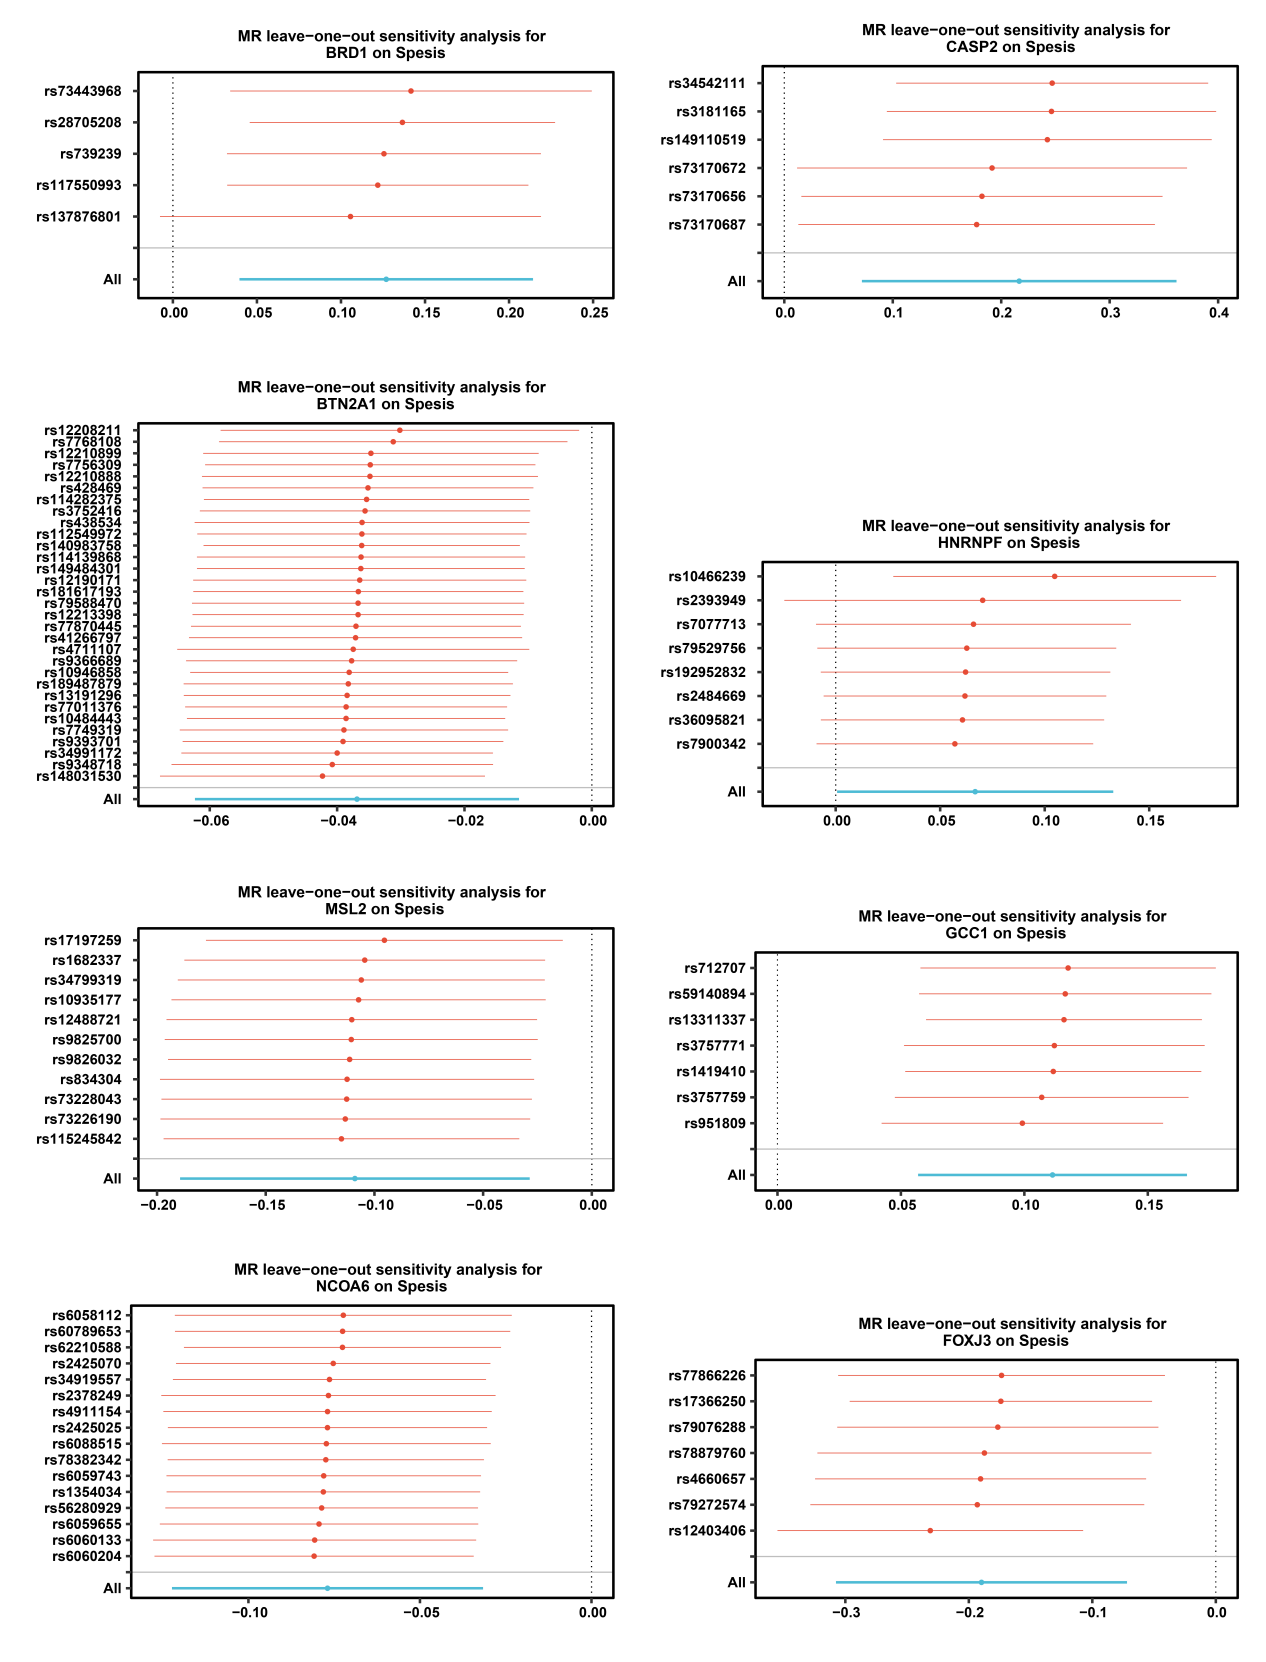


**Supplementary Figure 4** The LOO analysis of candidate genes.

**
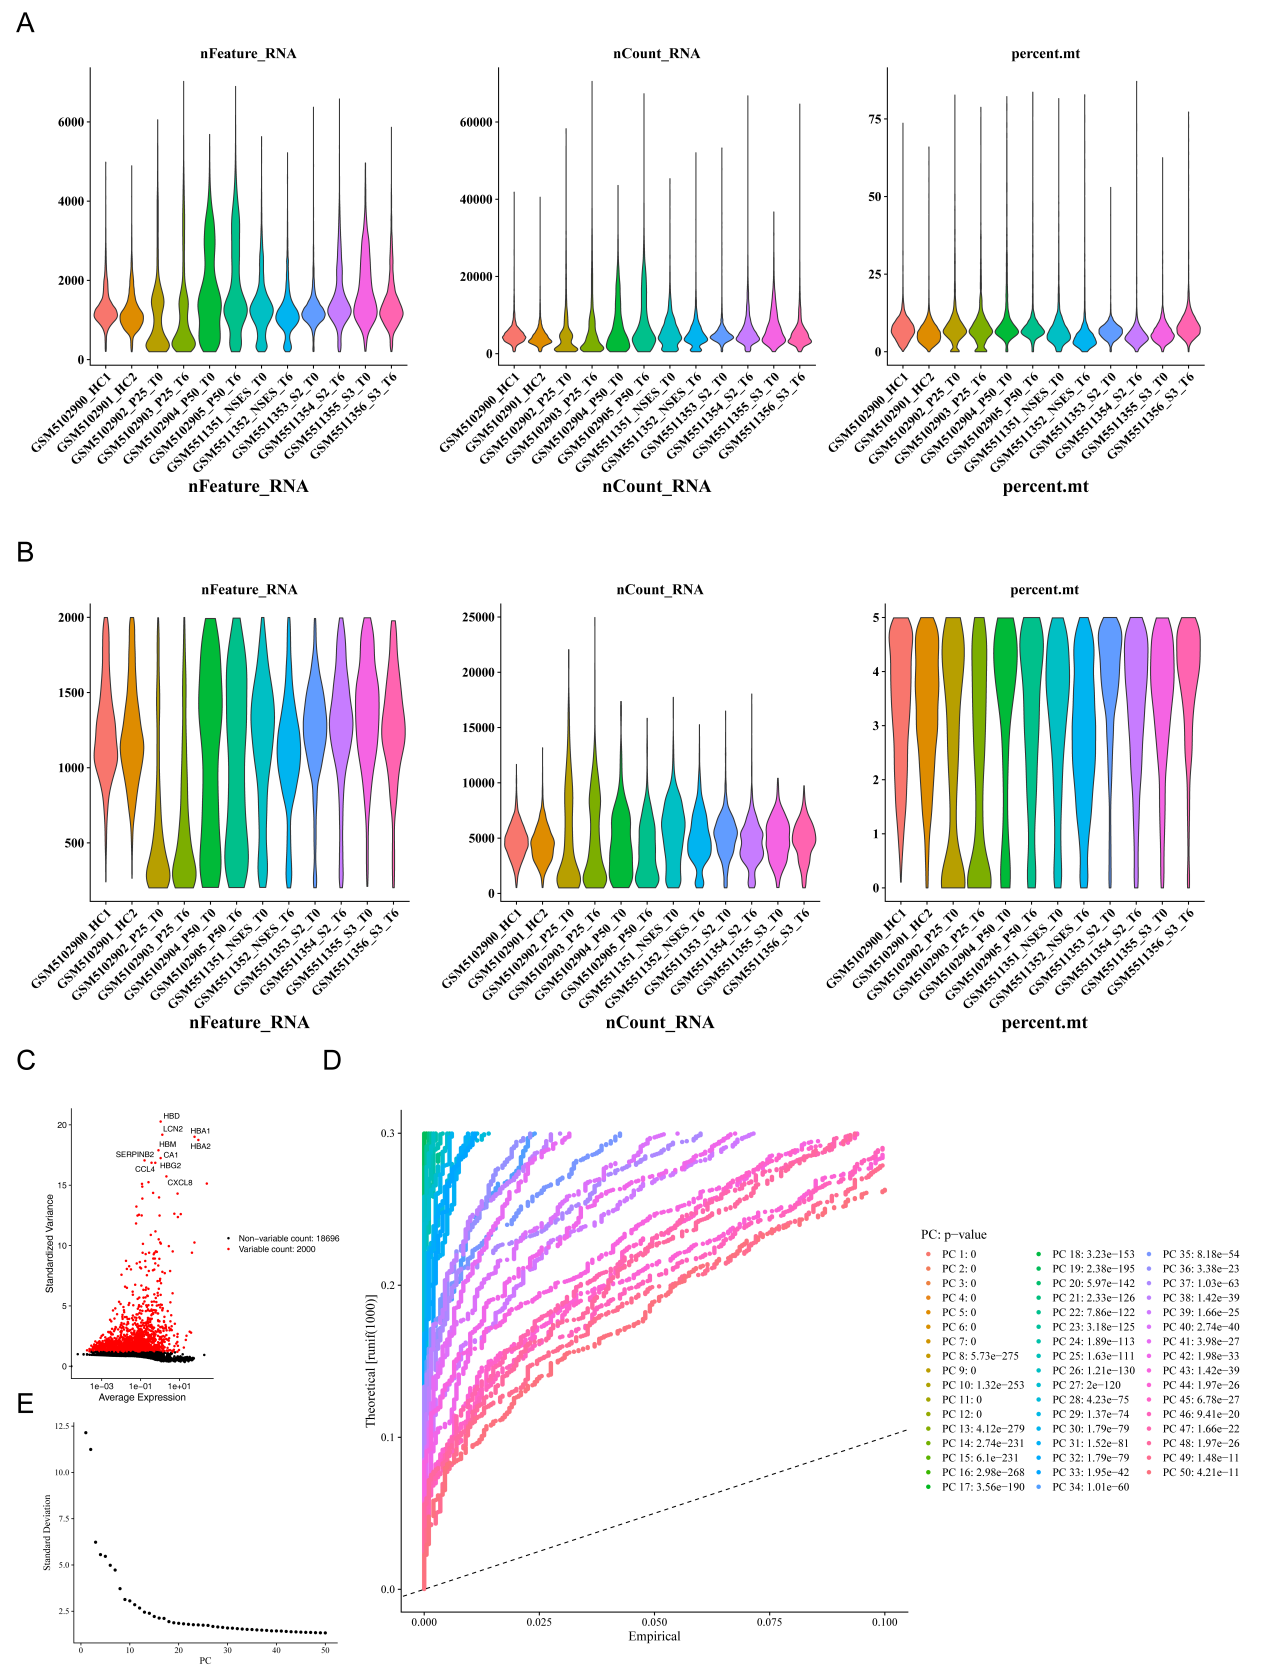
**

**Supplementary Figure 5** The result of single cell analysis.(a) Raw data of the single-cell dataset GSE167363 before quality control. (b) Data of the single-cell dataset GSE167363 after quality control. (c) The degree of variation of each gene in the single-cell data, where red represents hypervariable genes, and black represents less variable genes (only the names of the top 10 genes are shown). (d) Inflection point plots for PCA analysis. (e) Cell distribution plots for PCA analysis.


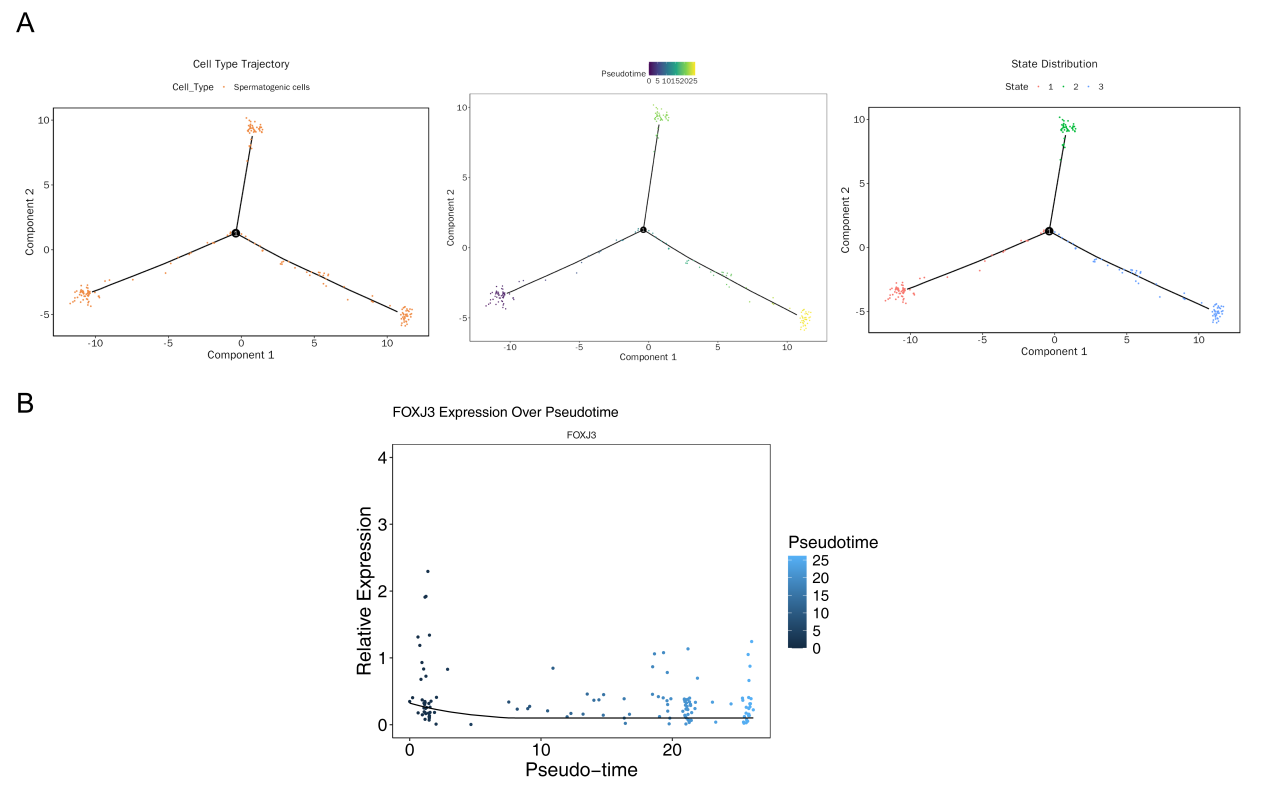


**Supplementary Figure 6** The result of pseudo-temporal analysis. (a) Differentiation trends of key cells. (b) The distribution of key cells on the pseudotime trajectory.

**Supplementary Table 1** The specific primer sequences of RT-qPCR.

| **Primer** | **Sequence** | |
| --- | --- | --- |
| BRD1 F | GACTGGTGTGTGGTGGTAGG | |
| BRD1 R | TACGCAGGGTGACCAAAGAC | |
| FOXJ3 F | GTTGCGGGTTCTTCCCTGT |
| FOXJ3 R | AGCTCAAAACTCAGGCAAGGG |
| Internal Control-H-GAPDH F | CGAAGGTGGAGTCAACGGATTT |
| Internal Control-H-GAPDH R | ATGGGTGGAATCATATTGGAAC |

**Supplementary Table 2** The reaction systems of RT-qPCR.

| **Component** | **Volume** |
| --- | --- |
| cDNA | 3ul |
| 2xUniversal Blue SYBR Green qPCR Master Mix | 5ul |
| Forward primer (10µM) | 1ul |
| Reverse primer (10µM) | 1ul |

**Supplementary Table 3** The amplification conditions of RT-qPCR.

|  | **Temperature** | **Time** |
| --- | --- | --- |
| Pre-denaturation | 95℃ | 1min |
| Denaturation | 95℃ | 20s |
| Annealing | 55℃ | 20s |
| Extension | 72℃ | 30s |
